# Supplementary material for: Emissions of trace gases from Australian temperate forest fires: emission factors and dependence on modified combustion efficiency
Source: Copernicus journal article supplement (doi:10.5194/acp-18-3717-2018), 2018-03-14
Supplement: Supplementary file 1 [file acp-18-3717-2018-supplement.zip]

## S1 Additional information on prescribed fires

As mentioned in the main text, we attended nine prescribed fires between 2010 and 2015. Seven of these fires were in the greater Sydney area in NSW, and two were in the State of Victoria. Table S1 lists the fires, their location, the dates on which they were sampled, the main vegetation type, the area burnt, the fuel loading, the time elapsed since the previous fire, the coordinates of the sampling sites and the method(s) of sampling deployed. The number of grab samples collected at each fire is indicated in brackets in the last column of Table S1. For the NSW fires, the vegetation type, the area burnt, the fuel load and the time since last fire were sourced from the burn plans provided by the New South Wales National Parks and Wildlife Service. For the fires in Victoria, this information was gathered by the research team.

The emission factors from the open-path FTIR measurements at the Lane Cove, Turramurra, Abaroo Creek, Gulguer Plateau and Alford's Point fires were reported in Paton-Walsh et al. (2014) but are reanalysed here to evaluate their dependence on modified combustion efficiency (MCE).

## S2 Details of the SIFT-MS analysis

As described in the main text, the SIFT-MS was operated in multiple ion mode, targeting eighteen VOC species. The list includes aromatic species, nitrogen-containing species, some oxygenated species, some small hydrocarbons and some biogenic species, targeting a breadth of chemical classes. Table S2 lists the species targeted, the reagent ion used, the mass-to-charge ratios measured and the calibration factors used to quantify them. It should be noted that hydrogen cyanide was assigned the same calibration factor as formaldehyde. Both species have a similar  $m/z$  (and are therefore likely to be transmitted in a similar way through the instrument), similar proton affinities, similar kinetics and little water dependence when measured by SIFT-MS (Španěl et al., 1999, 2004). Similarly, pyrrole was assigned the same calibration factor as isoprene. The instrument response to monoterpenes was determined using  $\alpha$ -pinene and eucalyptol (1,8-cineole).

## S3 Additional grab sampling results

Emission ratios (ER) were derived for individual fires for all species measured by White cell FTIR and SIFT-MS in the grab samples. For some species at some fires, the correlations were poor ( $R^2 < 0.5$ ) and these were excluded. Also, not every trace gas species was present at a detectable level in every sample. For some fires, this resulted in too few samples to allow an emission ratio to be meaningfully derived by regression for that species for a specific fire. Emission ratios for individual fires are listed in Table S3.

Figure S1 shows the correlation of ethane with CO for each of the five individual fires, and for all fires combined, as an example.

## S4 Additional open-path FTIR results

All trace gases measured by open-path FTIR at the prescribed fires in Victoria exhibited strong correlations with either CO or CO<sub>2</sub>. Correlations between the measured species at the Castlemaine fire are shown in Figure S2 as an example.

**Table S1.** Summary of prescribed fires in Australian temperate forest sampled in 2010–2013 and April 2015, including location, date, vegetation type, area burnt, pre-fire fuel loading, time elapsed since the area was last exposed to fire and sampling method(s) deployed. The number of grab samples collected at each fire is indicated in parentheses.

| Fire Name          | Location                             | Date(s)        | Vegetation                                 | Area (ha) | Fuel load (t ha <sup>-1</sup> ) | Time since last fire | Lat, Lon of sampling site | Method(s) (# of samples)                    |
|--------------------|--------------------------------------|----------------|--------------------------------------------|-----------|---------------------------------|----------------------|---------------------------|---------------------------------------------|
| Lane Cove          | Lane Cove National Park, NSW         | 31 Aug 2010    | Dry sclerophyll open woodland              | 4.8       | 18–26                           | unknown              | -33.79, 151.15            | OP-FTIR <sup>a</sup>                        |
| Turramurra         | Ku-Ring-Gai Chase National Park, NSW | 28 Sep 2010    | Dry sclerophyll shrubby forest/heath       | 148.5     | 20–25                           | unknown              | -33.67, 151.15            | OP-FTIR <sup>a</sup>                        |
| Abaroo Creek       | Heathcote National Park, NSW         | 11&12 May 2012 | Dry sclerophyll shrubby forest/heath       | 115       | 12.5                            | 10 years             | -34.10, 150.99            | Grab sampling (17) and OP-FTIR <sup>a</sup> |
| Gulguer Plateau    | National Park, NSW                   | 16 May 2012    | Dry sclerophyll forest, grassy understorey | 32        | 8–10                            | 30 years             | -34.13, 150.99            | Grab sampling (9) and OP-FTIR <sup>a</sup>  |
| Alfords Point      | Gulguer Nature Reserve, NSW          | 23 May 2012    | Dry sclerophyll shrubby forest             | 18        | 14–18                           | 9 years              | -33.99, 151.02            | Grab sampling (11) and OP-FTIR <sup>a</sup> |
| Prospect Reservoir | National Park, NSW                   | 27 Apr 2013    | Open woodland, grassy/shrubby understorey  | 12.5      | 10–12                           | >30 years            | -33.81, 150.91            | Grab sampling (17)                          |
| Yeramba Lagoon     | Georges River National Park, NSW     | 26&27 Aug 2013 | Dry sclerophyll shrubby forest             | 14        | 18                              | unknown              | -33.97, 151.01            | Grab sampling (18)                          |
| Greendale          | King Track, Greendale, VIC           | 13 Apr 2015    | Heathy dry sclerophyll forest              | 254       | 17 ± 2                          | 32 years             | -37.52, 144.28            | OP-FTIR                                     |
| Castlemaine        | Kalimna Park, Castlemaine, VIC       | 23 Apr 2015    | Heathy dry sclerophyll forest              | 22        | 16 ± 2                          | >30 years            | -37.05, 144.24            | OP-FTIR                                     |

<sup>a</sup> the emission factors from these OP-FTIR measurements were published in Paton-Walsh et al. (2014). The data are re-analysed to look at the dependence of emission factors on modified combustion efficiency (MCE) (see main text)

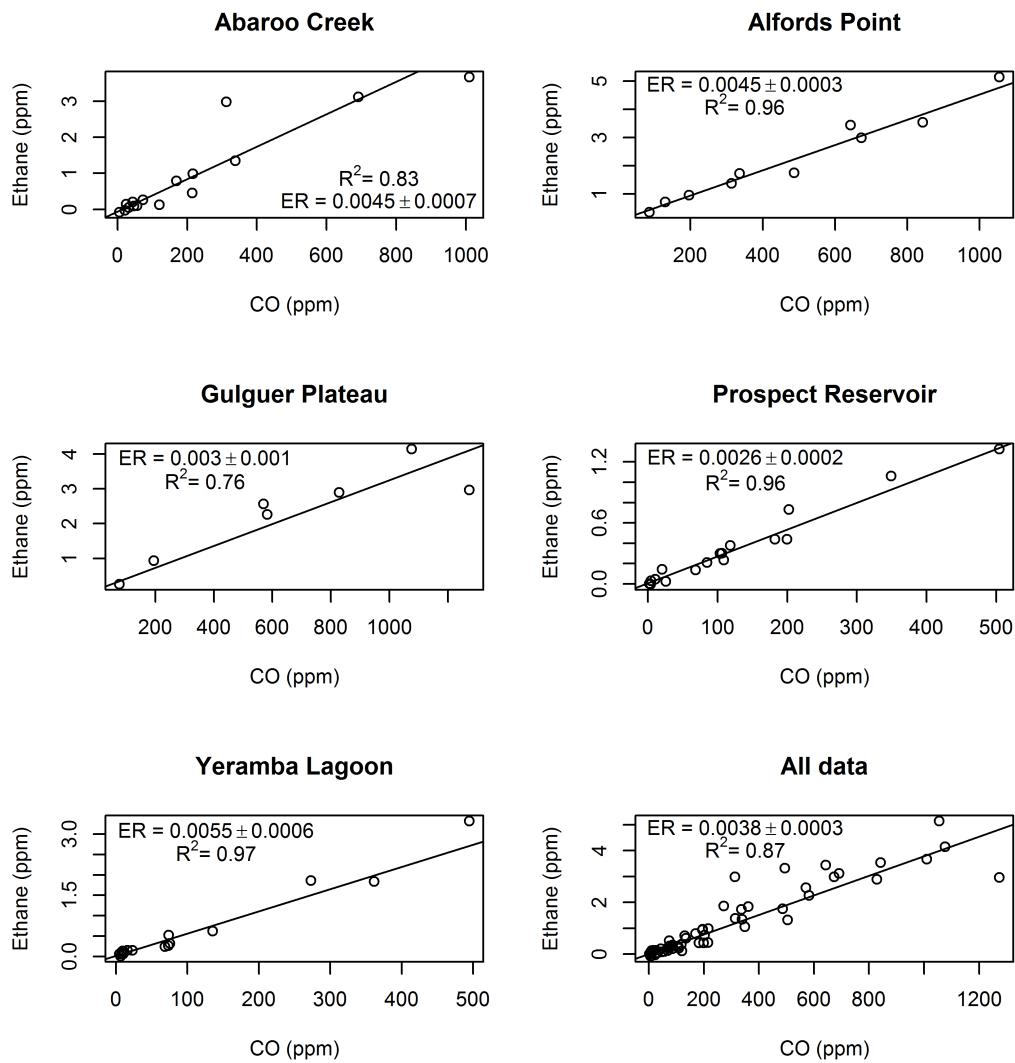

**Figure S1.** Emission ratio of ethane to CO for each individual fire sampled by grab sampling and for all the fires combined.

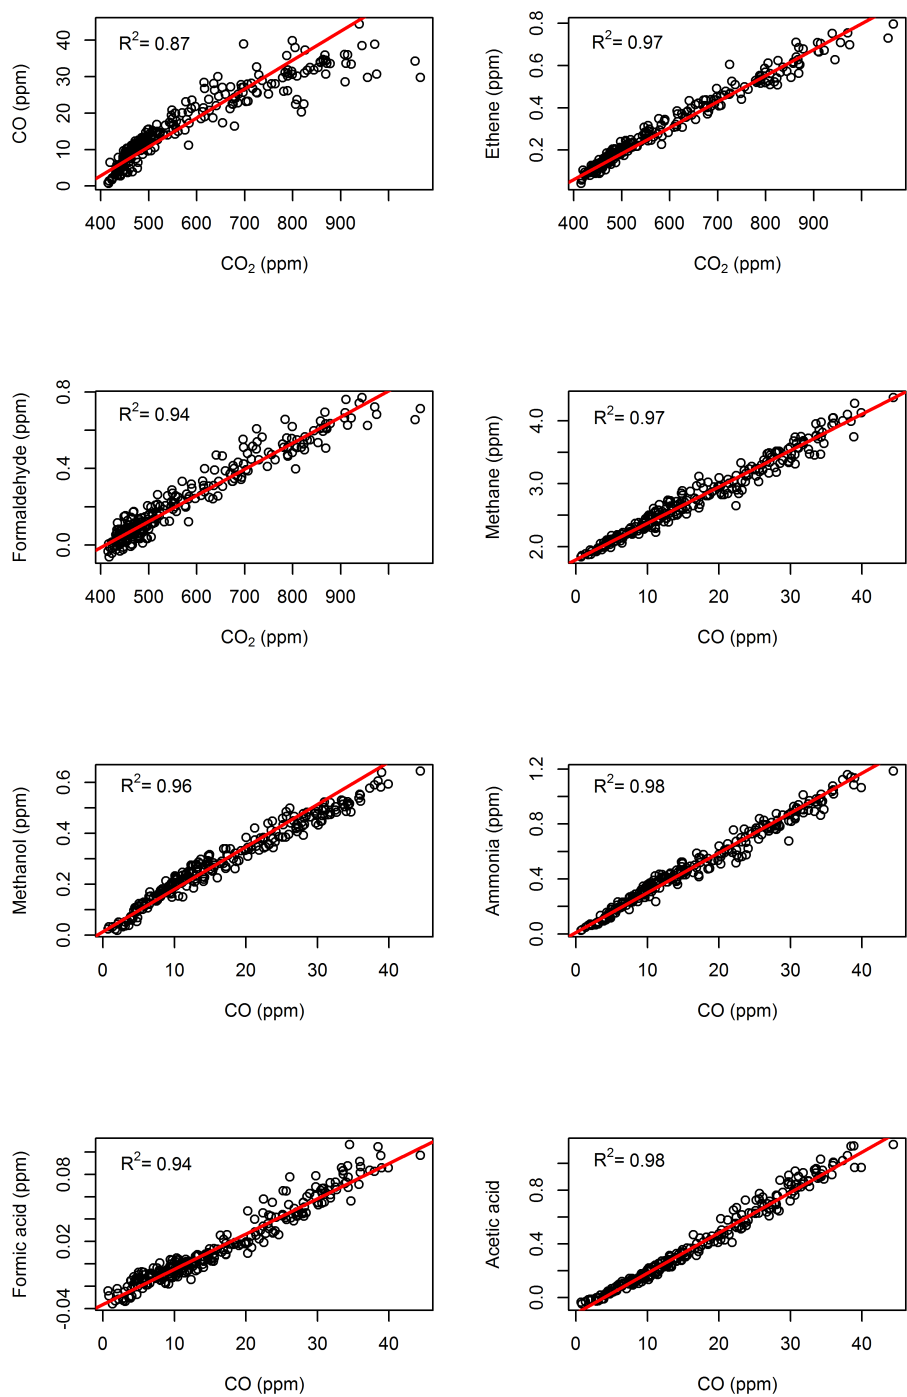

**Figure S2.** Correlation plots for open-path FTIR measurements at the Castlemaine, VIC fire.

**Table S2.** Summary of SIFT-MS analysis of smoke samples: targeted species, selected masses, dwell time and sensitivity.

| Species Targeted                           | Reagent ion                   | m/z        | Dwell time<br>(ms) | Sensitivity<br>(ncps ppb <sup>-1</sup> ) |
|--------------------------------------------|-------------------------------|------------|--------------------|------------------------------------------|
| H <sub>3</sub> O <sup>+</sup> and clusters | H <sub>3</sub> O <sup>+</sup> | 19, 37, 55 | 50                 | –                                        |
| NO <sup>+</sup> and clusters               | NO <sup>+</sup>               | 30, 48     | 50                 | –                                        |
| O <sub>2</sub> <sup>+</sup>                | O <sub>2</sub> <sup>+</sup>   | 32         | 50                 | –                                        |
| Acetaldehyde                               | H <sub>3</sub> O <sup>+</sup> | 45         | 100                | 11.3                                     |
| Acetone                                    | H <sub>3</sub> O <sup>+</sup> | 59         | 100                | 14.1                                     |
| Acetonitrile                               | H <sub>3</sub> O <sup>+</sup> | 42, 60     | 100                | 18.3                                     |
| Acetylene                                  | O <sub>2</sub> <sup>+</sup>   | 26         | 100                | 4.4                                      |
| Benzene                                    | NO <sup>+</sup>               | 78         | 100                | 5.2                                      |
| 1,3-butadiene                              | NO <sup>+</sup>               | 54         | 100                | 7.9                                      |
| Butanone                                   | NO <sup>+</sup>               | 102        | 100                | 11.4                                     |
| Ethanol                                    | NO <sup>+</sup>               | 45, 63     | 100                | 4.8                                      |
| Ethene                                     | O <sub>2</sub> <sup>+</sup>   | 28         | 100                | 4.5                                      |
| Eucalyptol                                 | NO <sup>+</sup>               | 154        | 100                | 12                                       |
| Formaldehyde                               | H <sub>3</sub> O <sup>+</sup> | 31         | 100                | 7.3                                      |
| Hydrogen cyanide                           | H <sub>3</sub> O <sup>+</sup> | 28         | 100                | 7.3 <sup>a</sup>                         |
| Isoprene (and furan)                       | NO <sup>+</sup>               | 68         | 100                | 7.9                                      |
| Methacrolein (and<br>methyl vinyl ketone)  | H <sub>3</sub> O <sup>+</sup> | 71         | 100                | 11.8                                     |
| Methanol                                   | H <sub>3</sub> O <sup>+</sup> | 33, 5      | 100                | 6.5                                      |
| Monoterpenes <sup>b</sup>                  | H <sub>3</sub> O <sup>+</sup> | 81, 137    | 100                | 10.4                                     |
| Pyrrole                                    | H <sub>3</sub> O <sup>+</sup> | 68         | 100                | 7.9 <sup>c</sup>                         |
| Toluene                                    | NO <sup>+</sup>               | 92         | 100                | 10.7                                     |
| Xylenes                                    | NO <sup>+</sup>               | 106        | 100                | 12                                       |

<sup>a</sup> assigned the same sensitivity as formaldehyde

<sup>b</sup> determined using  $\alpha$ -pinene and eucalyptol (1,8-cineole)

<sup>c</sup> assigned the same sensitivity as isoprene

## References

- Paton-Walsh, C., Smith, T. E. L., Young, E. L., Griffith, D. W. T., and Guérette, A.: New emission factors for Australian vegetation fires measured using open-path Fourier transform infrared spectroscopy - Part 1: Methods and Australian temperate forest fires, *Atmospheric Chemistry and Physics*, 14, 11 313–11 333, <https://doi.org/10.5194/acp-14-11313-2014>, 2014.
- 5 Španěl, P., Smith, D., Holland, T. A., Singary, W. A., and Elder, J. B.: Analysis of formaldehyde in the headspace of urine from bladder and prostate cancer patients using selected ion flow tube mass spectrometry, *Rapid Communications in Mass Spectrometry*, 13, 1354–1359, [https://doi.org/10.1002/\(sici\)1097-0231\(19990730\)13:14<1354::aid-rcm641>3.0.co;2-j](https://doi.org/10.1002/(sici)1097-0231(19990730)13:14<1354::aid-rcm641>3.0.co;2-j), [http://dx.doi.org/10.1002/\(SICI\)1097-0231\(19990730\)13:14{ }3C1354::AID-RCM641{ }3E3.0.CO;2-J](http://dx.doi.org/10.1002/(SICI)1097-0231(19990730)13:14{ }3C1354::AID-RCM641{ }3E3.0.CO;2-J), 1999.
- Španěl, P., Wang, T., and Smith, D.: Quantification of hydrogen cyanide in humid air by selected ion flow tube mass spectrometry, *Rapid Communications in Mass Spectrometry*, 18, 1869–1873, <https://doi.org/10.1002/rcm.1566>, <http://doi.wiley.com/10.1002/rcm.1566>, 2004.
- 10

**Table S3.** Emission ratios determined at individual fires for species measured by SIFT-MS and White cell FTIR in grab samples of smoke

| Species                | Ref. species    | Abaroo Creek    | R <sup>2</sup> | Alfords Point     | R <sup>2</sup> | Gulguer Plateau | R <sup>2</sup> | Prospect Reservoir | R <sup>2</sup> | Yeramba Lagoon  | R <sup>2</sup> | Mean (std. dev.) |
|------------------------|-----------------|-----------------|----------------|-------------------|----------------|-----------------|----------------|--------------------|----------------|-----------------|----------------|------------------|
| <b>White cell FTIR</b> |                 |                 |                |                   |                |                 |                |                    |                |                 |                |                  |
| CO                     | CO <sub>2</sub> | 0.15 ± 0.03     | 0.57           | 0.08 ± 0.02       | 0.62           | 0.44 ± 0.08     | 0.83           | 0.08 ± 0.02        | 0.89           | 0.18 ± 0.03     | 0.92           | 0.19 (0.15)      |
| CH <sub>4</sub>        | CO              | 0.067 ± 0.009   | 0.86           | 0.065 ± 0.004     | 0.98           | 0.060 ± 0.009   | 0.79           | 0.037 ± 0.004      | 0.92           | 0.07 ± 0.01     | 0.89           | 0.06 (0.01)      |
| Ethane                 | CO              | 0.0045 ± 0.0007 | 0.83           | 0.0045 ± 0.0003   | 0.96           | 0.003 ± 0.001   | 0.76           | 0.0026 ± 0.0002    | 0.96           | 0.0055 ± 0.0006 | 0.97           | 0.004 (0.001)    |
| <b>SIFT-MS</b>         |                 |                 |                |                   |                |                 |                |                    |                |                 |                |                  |
| Acetaldehyde           | CO              | 0.006 ± 0.004   | 0.99           | 0.0101 ± 0.0007   | 0.99           | 0.006 ± 0.002   | 0.63           | 0.010 ± 0.002      | 0.90           | 0.011 ± 0.005   | 0.96           | 0.009 (0.002)    |
| Acetone                | CO              | 0.0034 ± 0.0009 | 0.85           | 0.0052 ± 0.0006   | 0.98           | 0.003 ± 0.001   | 0.80           | 0.0040 ± 0.0009    | 0.90           | 0.004 ± 0.003   | 0.90           | 0.0039 (0.0008)  |
| Acetonitrile           | CO              | 0.0031 ± 0.0009 | 0.82           | 0.0050 ± 0.0005   | 0.98           | 0.0009 ± 0.0003 | 0.83           | 0.006 ± 0.002      | 0.94           | 0.005 ± 0.001   | 0.98           | 0.005 (0.001)    |
| Benzene                | Ethene          | 0.09 ± 0.02     | 0.64           | 0.068 ± 0.004     | 0.98           | 0.10 ± 0.02     | 0.58           | 0.088 ± 0.002      | 0.99           | 0.07 ± 0.01     | 0.99           | 0.08 (0.01)      |
| Butadiene              | Ethene          | 0.048 ± 0.003   | 0.93           | 0.047 ± 0.003     | 0.97           | 0.037 ± 0.005   | 0.82           | 0.04 ± 0.01        | 0.95           | 0.045 ± 0.005   | 0.96           | 0.042 (0.006)    |
| Ethanol <sup>b</sup>   | CO              |                 |                | 0.0021 ± 0.0005   | 0.97           |                 |                |                    |                |                 |                |                  |
| Furan + isoprene       | CO              | 0.0022 ± 0.0003 | 0.83           | 0.0018 ± 0.0002   | 0.96           | 0.0023 ± 0.0009 | 0.75           | 0.0009 ± 0.0005    | 0.65           | 0.0017 ± 0.0002 | 0.85           | 0.0018 (0.0006)  |
| Methanol               | CO              | 0.029 ± 0.004   | 0.88           | 0.028 ± 0.003     | 0.95           |                 |                | 0.016 ± 0.004      | 0.52           | 0.027 ± 0.009   | 0.66           | 0.025 (0.006)    |
| Toluene                | CO              | 0.0004 ± 0.0002 | 0.81           | 0.00086 ± 0.00003 | 0.98           | 0.0004 ± 0.0003 | 0.63           | 0.00045 ± 0.00009  | 0.63           | 0.0007 ± 0.0004 | 0.89           | 0.0006 (0.0002)  |
| mean MCE of samples    |                 | 0.89 ± 0.05     |                | 0.93 ± 0.02       |                | 0.78 ± 0.09     |                | 0.92 ± 0.03        |                | 0.89 ± 0.06     |                | 0.88 (0.07)      |
