# Supplementary material for: Emissions of trace gases from Australian temperate forest fires: emission factors and dependence on modified combustion efficiency
Source: Copernicus journal article supplement (doi:10.5194/acp-18-3717-2018), 2018-03-14
Supplement: Supplementary file 2 [file acp-18-3717-2018-supplement.zip]

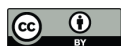

## *Supplement of*

# **Emissions of trace gases from Australian temperate forest fires: emission factors and dependence on modified combustion efficiency**

**Elise-Andrée Guérette et al.**

*Correspondence to:* Elise-Andrée Guérette (eag873@uowmail.edu.au)

- [acp-18-3717-2018-supplement-title-page.pdf](#)
- [Guerette\\_et\\_al\\_revised\\_supp](#)
  - [Guerette\\_et\\_al\\_EFs.csv](#)
  - [Guerette\\_et\\_al\\_ERs.csv](#)
- [acp-2017-883-supplement.pdf](#)

The copyright of individual parts of the supplement might differ from the CC BY 4.0 License.
