# Supplementary material for: Emissions of trace gases from Australian temperate forest fires: emission factors and dependence on modified combustion efficiency
Source: Copernicus journal article supplement (doi:10.5194/acp-18-3717-2018), 2018-03-14
Supplement: Supplementary file 3 [file acp-18-3717-2018-supplement.zip]

Archive with 5 entries (4 files):
- acp-18-3717-2018-supplement-title-page.pdf
- acp-2017-883-supplement.pdf
- Guerette_et_al_revised_supp/
- Guerette_et_al_revised_supp/Guerette_et_al_EFs.csv
- Guerette_et_al_revised_supp/Guerette_et_al_ERs.csv
