# Supplementary material for: Emissions of trace gases from Australian temperate forest fires: emission factors and dependence on modified combustion efficiency
Source: Copernicus journal article supplement (doi:10.5194/acp-18-3717-2018), 2018-03-14
Supplement: Supplementary file 3 [file acp-18-3717-2018-supplement.zip › Guerette_et_al_revised_supp/Guerette_et_al_EFs.csv]

Species	Method	parameter	units	Lane_Cove_NSW	Turramurra_NSW	Abaroo_Creek_NSW	Alfords_Point_NSW	Gulguer_Plateau_NSW	Prospect_Reservoir_NSW	Yeramba_Lagoon_NSW	Castlemaine_VIC	Greendale_VIC	all_data_NSW_fires
MCE	OP-FTIR	MCE		0.88	0.908	0.911	0.884	0.903			0.912	0.927
MCE	OP-FTIR	MCE unc		0.02	0.02	0.02	0.02	0.02			0.02	0.02
CO2	OP-FTIR	EF	g kg-1	1580	1640	1650	1590	1640			1650	1670
CO2	OP-FTIR	EF unc	g kg-1	160	160	170	160	160			170	170
CO	OP-FTIR	EF	g kg-1	136	106	102	133	112			101	84
CO	OP-FTIR	EF sd	g kg-1	22	17	16	21	18			16	13
CH4	OP-FTIR	EF	g kg-1	4.8	2.9	2.7	4.8	2.7			3.3	3.1
CH4	OP-FTIR	EF sd	g kg-1	0.9	0.5	0.4	0.9	0.5			0.2	0.2
C2H4	OP-FTIR	EF	g kg-1	1.6	1.1	1.1	1.5	1.1			1.2	1.1
C2H4	OP-FTIR	EF sd	g kg-1	0.3	0.2	0.2	0.3	0.2			0.3	0.2
C2H6	OP-FTIR	EF	g kg-1				0.5
C2H6	OP-FTIR	EF unc	g kg-1				0.2
H2CO	OP-FTIR	EF	g kg-1	2.4	1.5	1.4	1.8	1.7			1.5	1.3
H2CO	OP-FTIR	EF sd	g kg-1	0.4	0.3	0.2	0.3	0.3			0.3	0.2
CH3OH	OP-FTIR	EF	g kg-1	4	1.6	1.5	3.2	1.6			1.7	1.5
CH3OH	OP-FTIR	EF sd	g kg-1	0.8	0.3	0.3	0.6	0.3			0.3	0.4
CH3COOH	OP-FTIR	EF	g kg-1	5.5	2.8	2.6	4.8	3.6			6.5	6
CH3COOH	OP-FTIR	EF sd	g kg-1	1.2	0.6	0.6	1	0.8			1.2	0.9
HCOOH	OP-FTIR	EF	g kg-1	0.7	0.26	0.29	0.43	0.36			0.53	0.57
HCOOH	OP-FTIR	EF sd	g kg-1	0.2	0.06	0.07	0.11	0.09			0.2	0.1
NH3	OP-FTIR	EF	g kg-1	2.2	1	1.4	2.4	0.8			1.7	1.5
NH3	OP-FTIR	EF sd	g kg-1	0.5	0.2	0.3	0.6	0.2			0.2	0.2
N2O	OP-FTIR	EF	g kg-1				0.09	0.21
N2O	OP-FTIR	EF sd	g kg-1				0.01	0.04
MCE	White cell FTIR	MCE				0.894	0.931	0.776	0.923	0.894
MCE	White cell FTIR	MCE sd				0.045	0.023	0.088	0.033	0.055
CO2	White cell FTIR	mean EF	g kg-1			1620	1699	1405	1692	1629
CO2	White cell FTIR	EF sd	g kg-1			91	45	170	55	106
CO	White cell FTIR	mean EF	g kg-1			128	80	257	87	122
CO	White cell FTIR	EF sd	g kg-1			55	26	101	34	63
CH4	White cell FTIR	EF	g kg-1			4.4	3.1	8.6	2.1	4.3			4.0
CH4	White cell FTIR	EF sd	g kg-1			2.7	1.3	4.6	0.9	3.0			0.7
C2H4	White cell FTIR	EF	g kg-1										1.1
C2H4	White cell FTIR	EF unc	g kg-1										0.2
C2H6	White cell FTIR	EF	g kg-1			0.62	0.39	0.83	0.24	0.72			0.48
C2H6	White cell FTIR	EF unc	g kg-1			0.14	0.07	0.31	0.04	0.14			0.09
C2H2	SIFT-MS	EF	g kg-1										0.35
C2H2	SIFT-MS	EF unc	g kg-1										0.09
HCN	SIFT-MS	EF	g kg-1										0.7
HCN	SIFT-MS	EF unc	g kg-1										0.2
H2CO	SIFT-MS	EF	g kg-1										2.3
H2CO	SIFT-MS	EF unc	g kg-1										0.5
CH3OH	SIFT-MS	EF	g kg-1			4.2	2.6		1.6	3.8			3
CH3OH	SIFT-MS	EF unc	g kg-1			0.9	0.5		0.5	1.4			0.5
CH3CN	SIFT-MS	EF	g kg-1			0.58	0.59	0.34	0.76	0.80			0.7
CH3CN	SIFT-MS	EF unc	g kg-1			0.19	0.11	0.13	0.28	0.22			0.1
CH3CHO	SIFT-MS	EF	g kg-1			1.2	1.3	2.4	1.4	2.1			1.3
CH3CHO	SIFT-MS	EF unc	g kg-1			0.8	0.2	0.9	0.4	1.0			0.3
C2H5OH	SIFT-MS	EF	g kg-1										0.04
C2H5OH	SIFT-MS	EF unc	g kg-1										0.01
C4H6 (butadiene)	SIFT-MS	EF	g kg-1			0.17	0.17	0.11	0.13	0.16			0.23
C4H6 (butadiene)	SIFT-MS	EF unc	g kg-1			0.03	0.03	0.02	0.04	0.03			0.04
C3H6O (acetone + propanal)	SIFT-MS	EF	g kg-1			0.9	0.9	1.6	0.7	1.0			0.8
C3H6O (acetone + propanal)	SIFT-MS	EF unc	g kg-1			0.3	0.2	0.6	0.2	0.8			0.2
C4H5N (pyrrole)	SIFT-MS	EF	g kg-1										0.16
C4H5N (pyrrole)	SIFT-MS	EF unc	g kg-1										0.08
C4H4O + C5H8 (furan + isoprene)	SIFT-MS	EF	g kg-1			0.7	0.3	1.4	0.2	0.5			0.5
C4H4O + C5H8 (furan + isoprene)	SIFT-MS	EF unc	g kg-1			0.1	0.1	0.6	0.1	0.1			0.1
C4H6O (2-butenal, methacrolein, methyl vinyl ketone)	SIFT-MS	EF	g kg-1										1
C4H6O (2-butenal, methacrolein, methyl vinyl ketone)	SIFT-MS	EF unc	g kg-1										0.3
C4H8O (butanone)	SIFT-MS	EF	g kg-1										0.25
C4H8O (butanone)	SIFT-MS	EF unc	g kg-1										0.05
C6H6	SIFT-MS	EF	g kg-1			0.45	0.36	0.04	0.46	0.35			0.39
C6H6	SIFT-MS	EF unc	g kg-1			0.12	0.06	0.01	0.07	0.07			0.07
C7H8 (toluene)	SIFT-MS	EF	g kg-1			0.17	0.23	0.34	0.13	0.28			0.23
C7H8 (toluene)	SIFT-MS	EF unc	g kg-1			0.09	0.04	0.26	0.03	0.17			0.05
C8H10	SIFT-MS	EF	g kg-1										0.11
C8H10	SIFT-MS	EF unc	g kg-1										0.03
C10H16 + C10H18O (monoterpenes)	SIFT-MS	EF	g kg-1										0.5
C10H16 + C10H18O (monoterpenes)	SIFT-MS	EF unc	g kg-1										0.1
