# Supplementary material for: Emissions of trace gases from Australian temperate forest fires: emission factors and dependence on modified combustion efficiency
Source: Copernicus journal article supplement (doi:10.5194/acp-18-3717-2018), 2018-03-14
Supplement: Supplementary file 3 [file acp-18-3717-2018-supplement.zip › Guerette_et_al_revised_supp/Guerette_et_al_ERs.csv]

Species	Reference_species	Method	parameter	Lane_Cove_NSW	Turramurra_NSW	Abaroo_Creek_NSW	Alfords_Point_NSW	Gulguer_Plateau_NSW	Prospect_Reservoir_NSW	Yeramba_Lagoon_NSW	Castlemaine_VIC	Greendale_VIC	all_data_NSW_fires
CO	CO2	White cell FTIR	ER			0.15	0.08	0.44	0.08	0.18			0.17
CO	CO2	White cell FTIR	ER unc			0.03	0.02	0.08	0.02	0.03			0.06
CO	CO2	White cell FTIR	R2			0.57	0.62	0.83	0.89	0.92			0.47
CH4	CO	White cell FTIR	ER			0.067	0.065	0.060	0.037	0.07			0.059
CH4	CO	White cell FTIR	ER unc			0.009	0.004	0.009	0.004	0.01			0.003
CH4	CO	White cell FTIR	R2			0.86	0.98	0.79	0.92	0.89			0.89
C2H4	CO2	White cell FTIR	ER										0.0017
C2H4	CO2	White cell FTIR	ER unc										0.0002
C2H4	CO2	White cell FTIR	R2										0.71
C2H6	CO	White cell FTIR	ER			0.0045	0.0045	0.003	0.0026	0.0055			0.0038
C2H6	CO	White cell FTIR	ER unc			0.0007	0.0003	0.001	0.0002	0.0006			0.0003
C2H6	CO	White cell FTIR	R2			0.83	0.96	0.76	0.96	0.97			0.87
C2H4	CO2	SIFT-MS	ER										0.0018
C2H4	CO2	SIFT-MS	ER unc										0.0002
C2H4	CO2	SIFT-MS	R2										0.77
C2H2	C2H4	SIFT-MS	ER										0.21
C2H2	C2H4	SIFT-MS	ER unc										0.04
C2H2	C2H4	SIFT-MS	R2										0.59
HCN	CO	SIFT-MS	ER										0.0063
HCN	CO	SIFT-MS	ER unc										0.0007
HCN	CO	SIFT-MS	R2										0.46
H2CO	HCN	SIFT-MS	ER										2.9
H2CO	HCN	SIFT-MS	ER unc										0.3
H2CO	HCN	SIFT-MS	R2										0.65
CH3OH	CO	SIFT-MS	ER			0.029	0.028		0.016	0.027			0.022
CH3OH	CO	SIFT-MS	ER unc			0.004	0.003		0.004	0.009			0.002
CH3OH	CO	SIFT-MS	R2			0.88	0.95		0.52	0.66			0.72
CH3CN	CO	SIFT-MS	ER			0.0031	0.0050	0.0009	0.006	0.005			0.0038
CH3CN	CO	SIFT-MS	ER unc			0.0009	0.0005	0.0003	0.002	0.001			0.0005
CH3CN	CO	SIFT-MS	R2			0.82	0.98	0.83	0.94	0.98			0.91
CH3CHO	CO	SIFT-MS	ER			0.006	0.0101	0.006	0.010	0.011			0.007
CH3CHO	CO	SIFT-MS	ER unc			0.004	0.0007	0.002	0.002	0.005			0.001
CH3CHO	CO	SIFT-MS	R2			0.79	0.99	0.63	0.9	0.96			0.75
C2H5OH	CO	SIFT-MS	ER				0.00021						0.00021
C2H5OH	CO	SIFT-MS	ER unc				0.00005						0.00005
C2H5OH	CO	SIFT-MS	R2				0.97						0.97
C4H6 (butadiene)	C2H4	SIFT-MS	ER			0.048	0.047	0.037	0.04	0.045			0.042
C4H6 (butadiene)	C2H4	SIFT-MS	ER unc			0.003	0.003	0.005	0.01	0.005			0.002
C4H6 (butadiene)	C2H4	SIFT-MS	R2			0.93	0.97	0.82	0.95	0.96			0.95
C3H6O (acetone + propanal)	CO	SIFT-MS	ER			0.0034	0.0052	0.003	0.0040	0.004			0.0034
C3H6O (acetone + propanal)	CO	SIFT-MS	ER unc			0.0009	0.0006	0.001	0.0009	0.003			0.0005
C3H6O (acetone + propanal)	CO	SIFT-MS	R2			0.85	0.98	0.80	0.9	0.86			0.74
C4H5N (pyrrole)	CH3CN	SIFT-MS	ER										0.15
C4H5N (pyrrole)	CH3CN	SIFT-MS	ER unc										0.07
C4H5N (pyrrole)	CH3CN	SIFT-MS	R2										0.78
C4H4O + C5H8 (furan + isoprene)	CO	SIFT-MS	ER			0.0022	0.0018	0.0023	0.0009	0.0017			0.0019
C4H4O + C5H8 (furan + isoprene)	CO	SIFT-MS	ER unc			0.0003	0.0002	0.0009	0.0005	0.0002			0.0003
C4H4O + C5H8 (furan + isoprene)	CO	SIFT-MS	R2			0.83	0.96	0.75	0.65	0.85			0.87
C4H8O (butanone)	CO	SIFT-MS	ER										0.00082
C4H8O (butanone)	CO	SIFT-MS	ER unc										0.00007
C4H8O (butanone)	CO	SIFT-MS	R2										0.69
C6H6	C2H4	SIFT-MS	ER			0.09	0.068	0.10	0.088	0.07			0.078
C6H6	C2H4	SIFT-MS	ER unc			0.02	0.004	0.02	0.002	0.01			0.006
C6H6	C2H4	SIFT-MS	R2			0.64	0.98	0.58	0.99	0.99			0.84
C7H8 (toluene)	CO	SIFT-MS	ER			0.0004	0.00086	0.0004	0.00045	0.0007			0.0006
C7H8 (toluene)	CO	SIFT-MS	ER unc			0.0002	0.00003	0.0003	0.00009	0.0004			0.0001
C7H8 (toluene)	CO	SIFT-MS	R2			0.81	0.98	0.63	0.63	0.89			0.75
C8H10	C7H8 (toluene)	SIFT-MS	ER										0.42
C8H10	C7H8 (toluene)	SIFT-MS	ER unc										0.04
C8H10	C7H8 (toluene)	SIFT-MS	R2										0.75
C10H16 + C10H18O (monoterpenes)	CH3OH	SIFT-MS	ER										0.042
C10H16 + C10H18O (monoterpenes)	CH3OH	SIFT-MS	ER unc										0.006
C10H16 + C10H18O (monoterpenes)	CH3OH	SIFT-MS	R2										0.86
CH4	CO	OP-FTIR	ER	0.062	0.048	0.046	0.063	0.041			0.0571	0.0633
CH4	CO	OP-FTIR	ER unc	0.005	0.004	0.003	0.005	0.003			0.0006	0.0005
CH4	CO	OP-FTIR	R2	0.91	0.98	0.98	0.97	0.98			0.97	0.99
C2H4	CO2	OP-FTIR	ER	0.0016	0.0010	0.0010	0.0015	0.0010			0.00118	0.00105
C2H4	CO2	OP-FTIR	ER unc	0.0003	0.0002	0.0002	0.0003	0.0002			0.00001	0.00002
C2H4	CO2	OP-FTIR	R2	0.83	0.96	0.97	0.98	0.95			0.97	0.91
C2H6	CO	OP-FTIR	ER				0.0037
C2H6	CO	OP-FTIR	ER unc				0.0010
C2H6	CO	OP-FTIR	R2				0.81
H2CO	CO2	OP-FTIR	ER	0.0022	0.0013	0.0012	0.0016	0.0015			0.00133	0.00113
H2CO	CO2	OP-FTIR	ER unc	0.0003	0.0002	0.0002	0.0002	0.0002			0.00002	0.00003
H2CO	CO2	OP-FTIR	R2	0.73	0.89	0.90	0.98	0.91			0.94	0.82
CH3OH	CO	OP-FTIR	ER	0.026	0.013	0.013	0.021	0.012			0.0144	0.0154
CH3OH	CO	OP-FTIR	ER unc	0.002	0.001	0.001	0.002	0.001			0.0002	0.0006
CH3OH	CO	OP-FTIR	R2	0.90	0.95	0.93	0.97	0.94			0.96	0.95
CH3COOH	CO	OP-FTIR	ER	0.019	0.012	0.012	0.017	0.015			0.0303	0.0331
CH3COOH	CO	OP-FTIR	ER unc	0.003	0.002	0.002	0.002	0.002			0.0003	0.0005
CH3COOH	CO	OP-FTIR	R2	0.86	0.85	0.97	0.98	0.93			0.98	0.95
HCOOH	CO	OP-FTIR	ER	0.0033	0.0015	0.0017	0.0020	0.0020			0.00321	0.00414
HCOOH	CO	OP-FTIR	ER unc	0.0006	0.0003	0.0003	0.0004	0.0004			0.00005	0.00007
HCOOH	CO	OP-FTIR	R2	0.80	0.69	0.88	0.96	0.92			0.94	0.93
NH3	CO	OP-FTIR	ER	0.026	0.015	0.023	0.030	0.012			0.0276	0.0291
NH3	CO	OP-FTIR	ER unc	0.004	0.002	0.003	0.004	0.002			0.0003	0.0004
NH3	CO	OP-FTIR	R2	0.90	0.85	0.93	0.93	0.91			0.98	0.95
N2O	CO2	OP-FTIR	ER				0.000054	0.00013
N2O	CO2	OP-FTIR	ER unc				0.000008	0.00002
N2O	CO2	OP-FTIR	R2				0.87	0.81
